# Supplementary material for: Caveolin-1 promotes glioma progression and maintains its mitochondrial inhibition resistance
Source: PubMed Central journal article supplement (PMC10465474; doi:10.1007/s12672-023-00765-5), 2023-08-29

Supplementary Figure 1

A

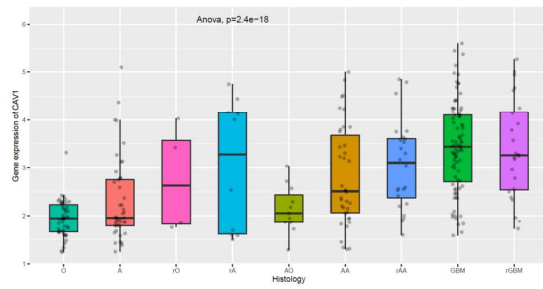

B

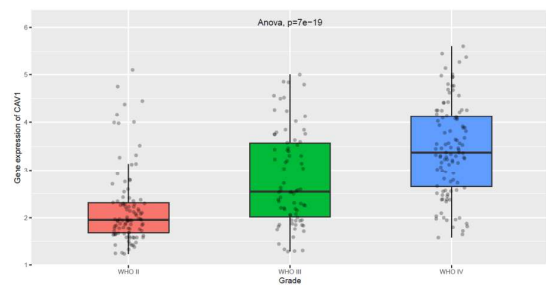

C

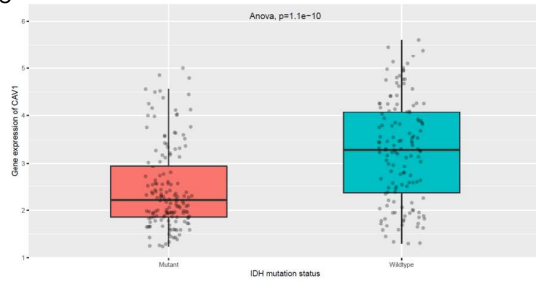

D

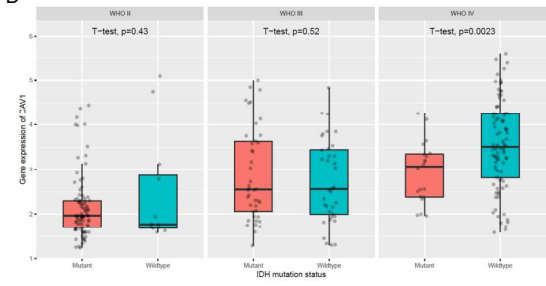

E

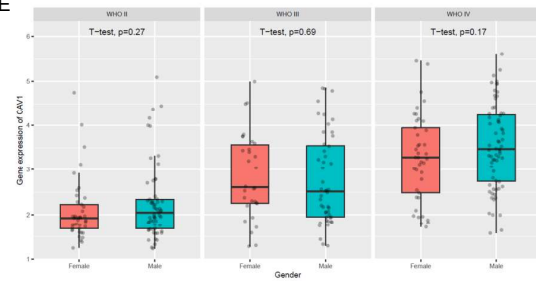

F

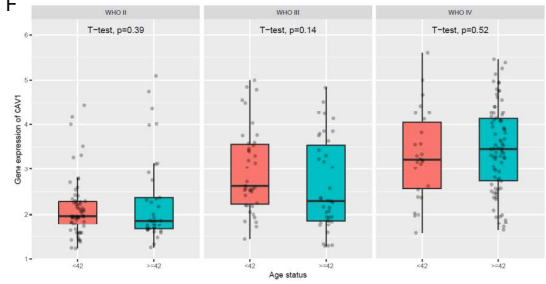

G

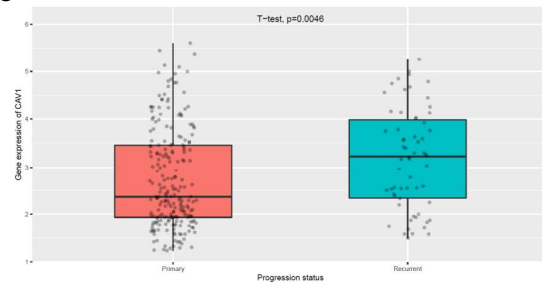

H

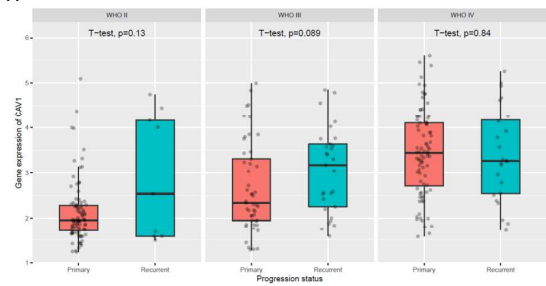

A

All WHO grade survival (primary glioma)

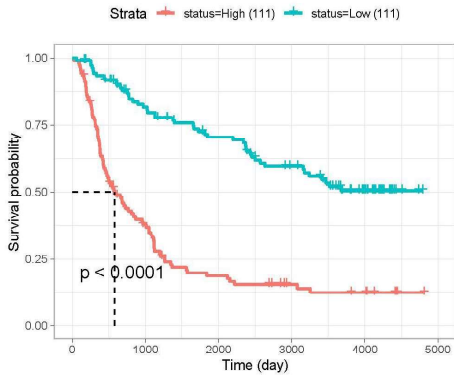

All WHO grade survival (recurrent glioma)

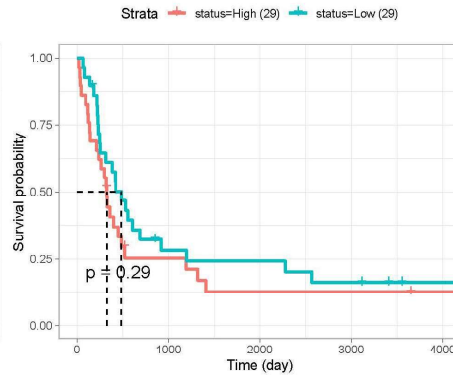

B

WHO grade II survival (primary glioma)

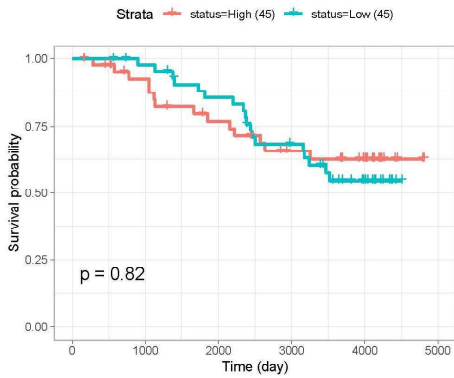

WHO grade II survival (recurrent glioma)

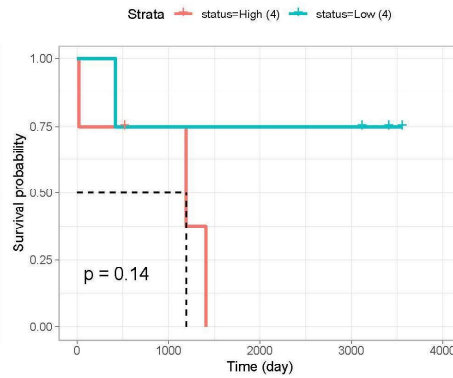

C

WHO grade III survival (primary glioma)

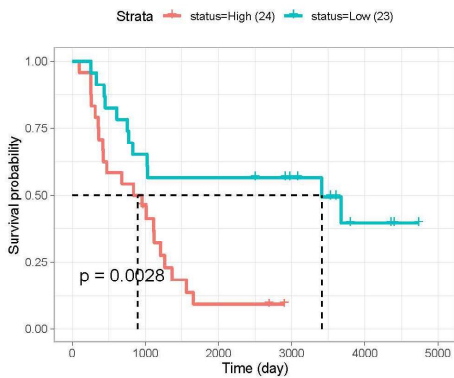

WHO grade III survival (recurrent glioma)

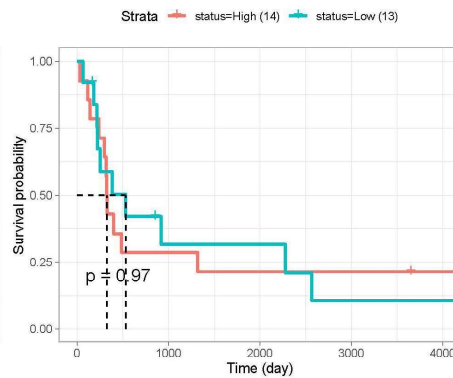

D

WHO grade IV survival (primary glioma)

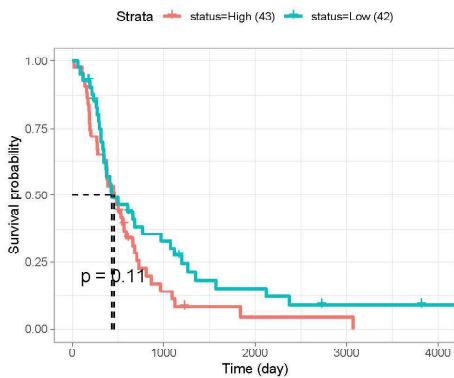

WHO grade IV survival (recurrent glioma)

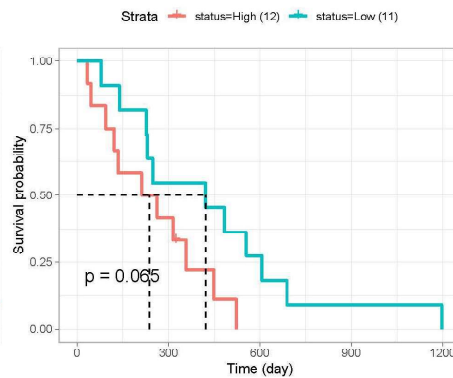

A

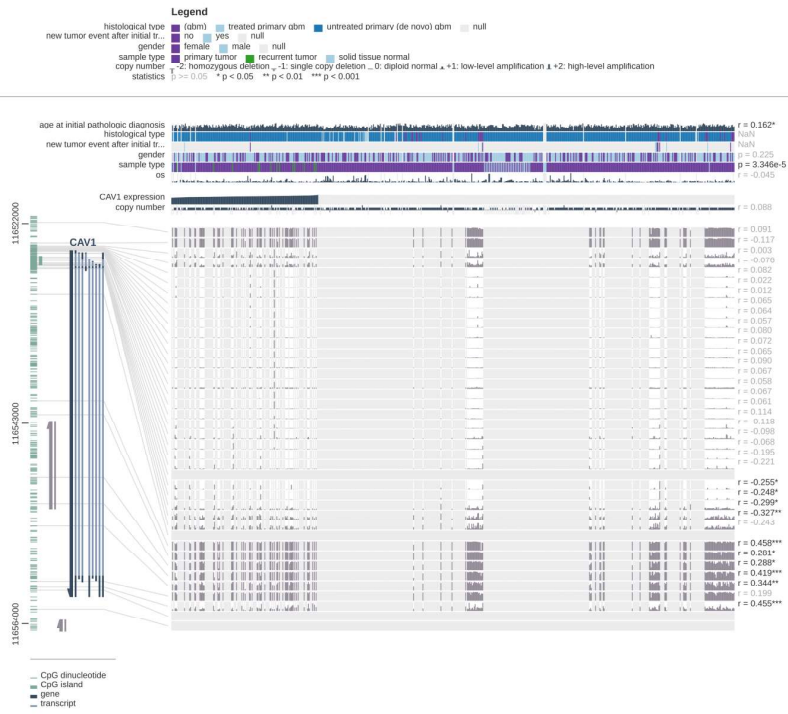

B

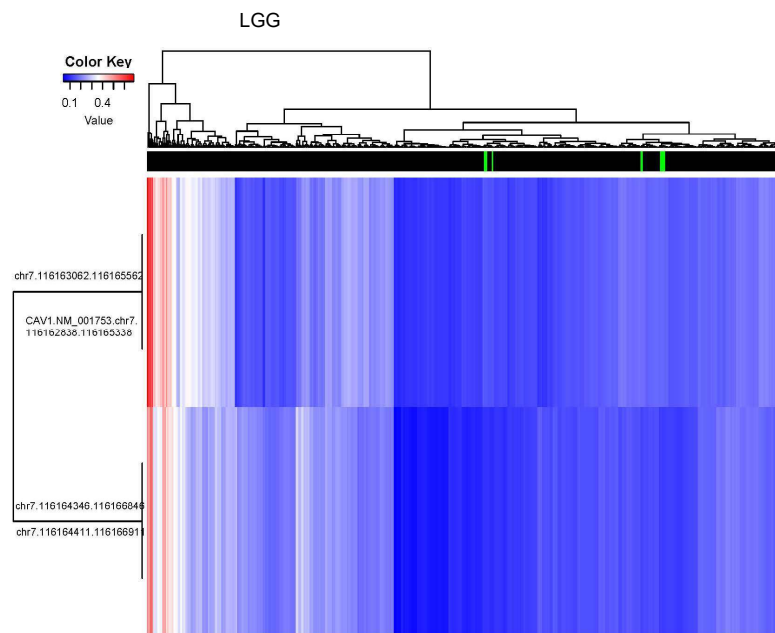

C

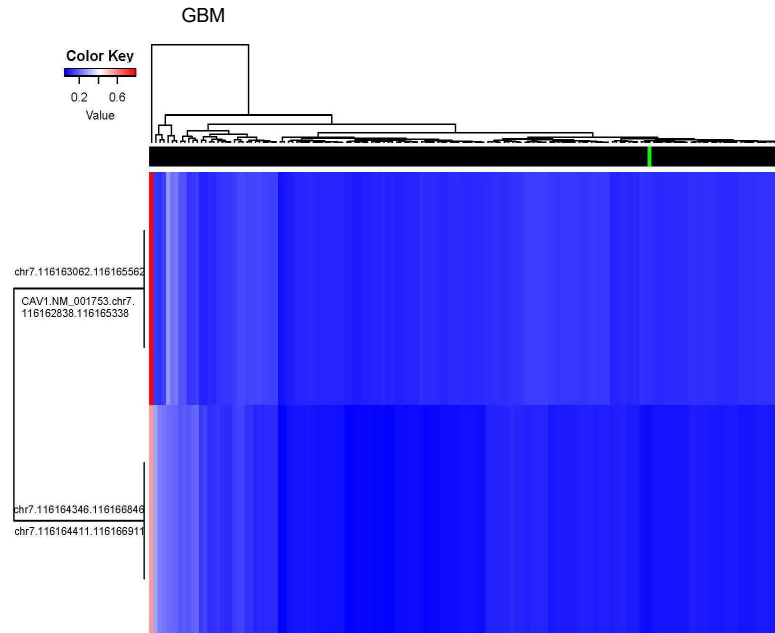

Supplementary Figure 4

A

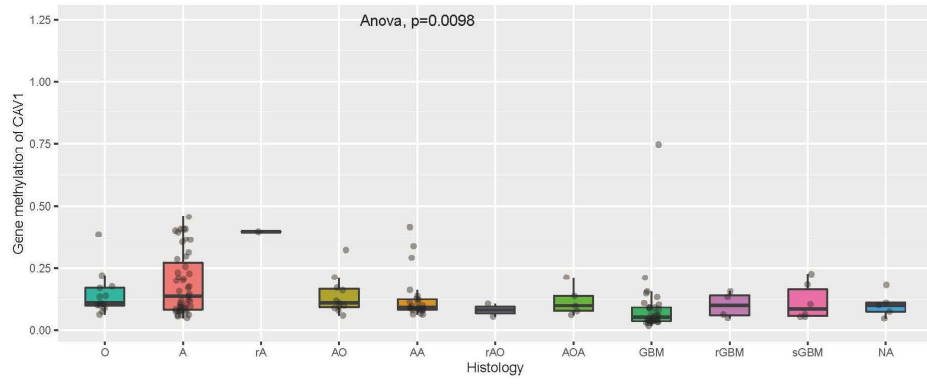

B

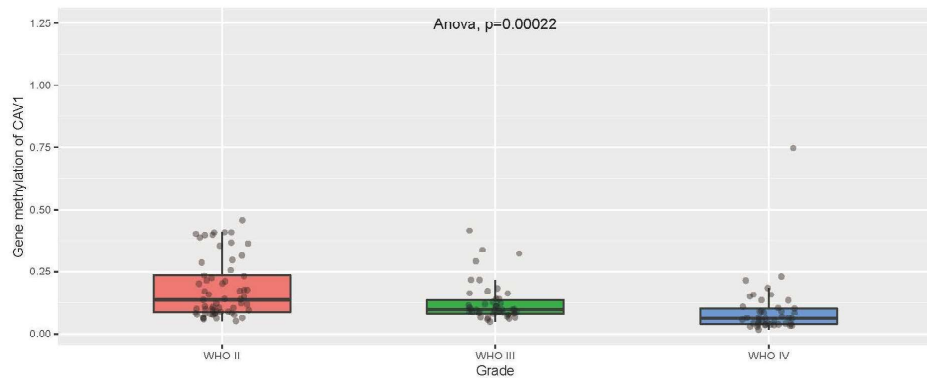

C

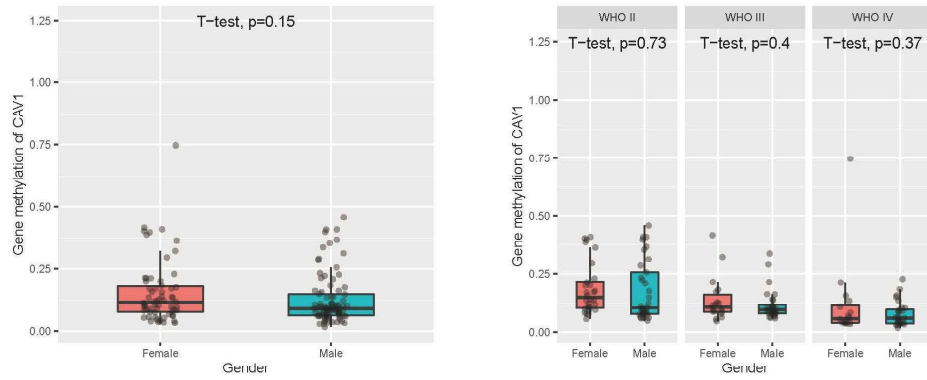

D

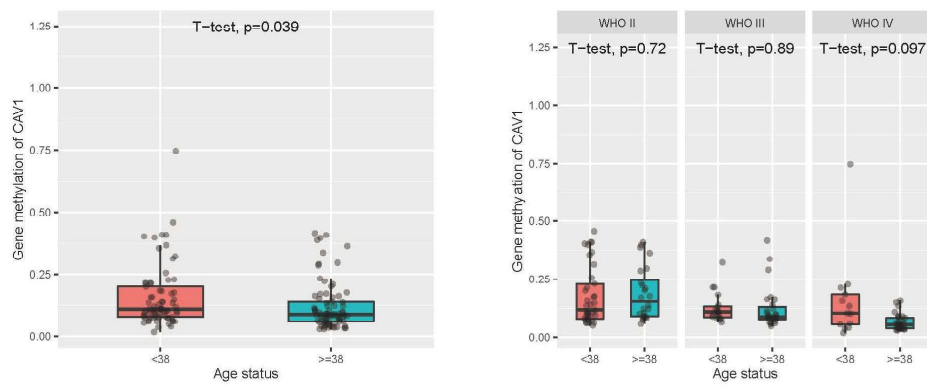

Supplementary Figure 5

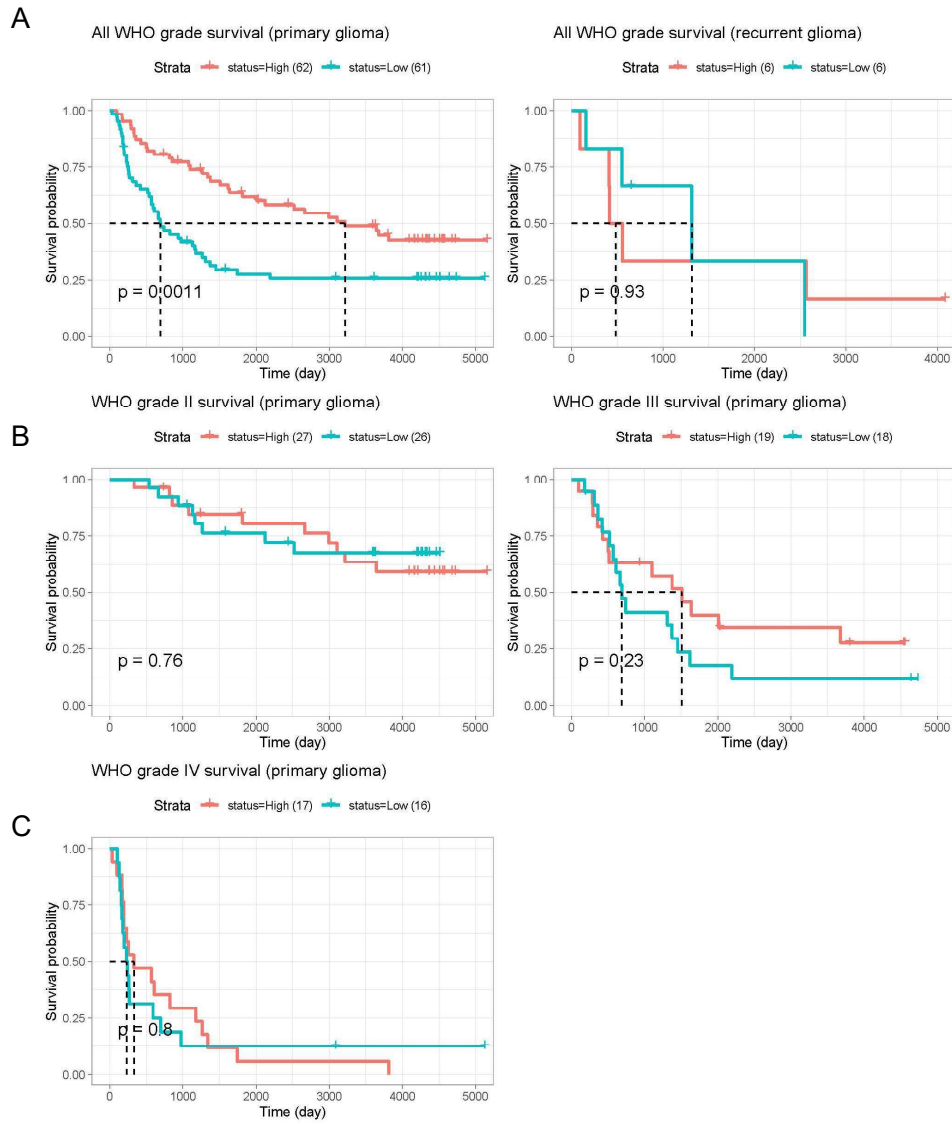

Supplement: 12672_2023_765_MOESM6_ESM.pdf [file 12672_2023_765_MOESM6_ESM.pdf]
